# Supplementary material for: Primary Biliary Cirrhosis Associated with HLA, IL12A, and IL12RB2 Variants
Source: Atypon-hosted journal article supplement (doi:10.1056/nejmoa0810440), 2009-05-20

## Supplementary Appendix

This appendix has been provided by the authors to give readers additional information about their work.

Supplement to: Hirschfield GM, Liu X, Xu C, et al. Primary biliary cirrhosis associated with *HLA*, *IL12A*, and *IL12RB2* variants. *N Engl J Med* 2009;360:2544-55. DOI: 10.1056/NEJMoa0810440.

## *SUBJECTS*

Canada-based cases had a mean age of 60.7 years (23-92) at recruitment and a diagnosis of PBC for an average of 8.9 years (1-30). 93% of cases were female, 95.5% AMA positive and 5.2% had received a liver transplant. Cases were recruited between 2005-2008 with the majority (372) ascertained from Toronto and the remaining from London (Ontario), Halifax, Edmonton and Calgary. US-based cases had a mean age at recruitment of 60.2 years (29-85) and a diagnosis of PBC for an average of 9.3 years (0-33). 92.4% of US cases were female and 87.6% AMA positive; 10.5% had received a liver transplant.

Canadian control subjects (n=1279, 87% female) were geographically matched healthy volunteers with no prior history of autoimmune disease (mean age 31.4 years, range 18-88) also ascertained between 2005 and 2008. A total of 1137 healthy subjects from the M.D. Anderson Cancer Center Lung Cancer Study, a case-control study ongoing since 1999, were also used as controls. These “historic” controls (mean age 61.1; SD 8.9) were ascertained from Kelsey-Seybold Clinics in the Houston Metropolitan area. Caucasian ancestry was ascertained first by self-report (questionnaire choices including white (Caucasian), Indian subcontinent, Japanese, other Asian, Black African, African-American, specified Other) and then by excluding any subjects whose genotypes clustered with other or mixed ancestry groups (i.e. we excluded African-Americans, Hispanics, Asians, and Caribbean Islanders).

Another 310 healthy “US-based” controls were from the Mayo Clinic PBC Genetic Epidemiology Registry and Biospecimen Repository. Controls were recruited from the Mayo

Clinic Division of General Internal Medicine during annual visits for preventative medical examination and were matched by age ( $\pm 2.5$  years), gender, and state of residence to individual PBC patients. Control exclusion criteria included evidence of prior or current liver disease. 90% were female and the mean age 62.4 years (33-88).

### ***GENOTYPING***

DNA was prepared using standard methods. A total of 536 samples from PBC subjects and 399 control subjects collected in Canada were genotyped on Illumina HumanHap370 Genotyping BeadChips. This platform was selected because of the genome coverage provided, reflecting the almost exclusive use of tag SNPs with high minor allele frequencies (median=0.25), density (mean inter SNP distance=7.8kb) and LD (mean  $r^2 > 0.8$ ). A total of 1137 samples from M.D. Anderson Cancer Center Lung Cancer Study (historic controls) were genotyped at the Centre for Inherited Disease Research (Johns Hopkins University) on the Illumina HumanHap300 chip. Cluster definitions for each SNP were determined using Illumina BeadStudio Genotyping Module v 2.3.41 and the combined intensity data from ~90% of study samples. The resulting cluster definition file was used on all study samples to determine genotype calls and quality scores. Genotype calls were made when a genotype yielded a quality score (Gencall value) of 0.25 or higher in Texas and 0.15 in the Canadian samples. Among these markers, 0.46% of cells were missing. For the lung control study, fifty-four blind duplicate pairs were included, the concordance of SNP genotype calls was 99.99%. Based upon 106 duplicate HapMap samples (56 unique individuals) from all 4 populations (Caucasian, Yoruban, Chinese and Japanese) the

concordance was 99.8%, and the Mendelian consistency rate calculated from 29 Hapmap trios (16 unique trios) was 99.96%.

A Sequenom MassARRAY iPLEX platform was used for both replication and fine-mapping genotyping (<http://www.sequenom.com/seq-genotyping.html>). In brief, allele-specific extension products were plated onto a SpectroCHIP (Sequenom), subjected to mass spectrometric analysis (MassARRAY system, Sequenom, San Diego, CA) and the genotypes identified using SpectroCALLER software.

In stage 2, we genotyped 16 SNPs in 14 genes/loci based on GWA signals. For fine-mapping studies, initiated coincident with the stage 2 analysis, a total of 93 SNPs from three different loci (*IL12A*, *IL12RB2-IL23R*, and *STAT4*) were selected based on at least one of the following criteria: 1) HapMap Phase II data (<http://www.hapmap.org/>) identifying the SNP as a TagSNP with minor allele frequency >0.05 or a higher minor allele frequency (>0.01) and  $r^2$  threshold of 0.8 and/or 2) localization in potential functional regulatory gene regions (i.e. exon, exon-intron boundary, 5' or 3' flank). Out of 93 SNPs tested, 89 passed quality control filters including 25 across the *STAT4* gene and 200kb flanking regions at chromosome 2q32.2-q32.3, 25 in the *IL12A* region of chromosome 3q25.33-q26, and 39 in the *IL12RB2/IL23R* loci at chromosome 1p31.1-31.2.

### ***POPULATION-BASED QUALITY FILTERS***

Genotyping data from HumHap370 and HumanHap300 were filtered prior to data merging as indicated above. After setting Maximum per-person missing (MIND) to be no less than 0.05 and GENO (Maximum per-SNP missing) to be no less than 0.05, minor allele frequency to be no less than 0.01 and Hardy Weinberg equilibrium test to be no less than 0.0001, 929 samples and 334,444 SNPs from the HumanHap370 data set (including 536 PBC cases and 399 controls) and 1137 subjects and 312,547 SNPs from the HumanHap300 data set were retained. After merging, the same MIND and GENO settings were applied to all of the samples and SNPs. The final combined data retain 2012 subjects (505 PBC subjects and 1507 control subjects) and 305,724 common SNPs. Quantile–Quantile Plots of Test Statistics (P Values) for the PBC GWA are shown in supplementary Figure S1.

#### ***ASSESSMENT OF STATISTICAL POWER***

To carry out power calculations for a GWA screen, a genotypic relative risk analysis (<http://statgen.iop.kcl.ac.uk/gpc/cc2.html>) was conducted with the following parameters: disease prevalence, 0.001 for PBC,  $D'$  between disease and SNP alleles, 1.0; genotypic heterozygous relative risk, 1.5 under a log-additive model; alpha,  $5 \times 10^{-5}$  (corresponding to 16/317,000 the probability to retain a marker from the first to second stage of analysis) marker allele frequency (A) = 0.20, as this is the mean minor allele frequency of the tested SNPs. The power to detect association was estimated as 81.7% based on the sample of 2072 subjects (536 cases and 1536 controls) in a GWA study (stage 1), and 90.7% based on the total sample of 3744 subjects (1031 PBC cases and 2713 healthy controls) in a combined analysis using a genome-wide significance

criterion of  $p < 1 \times 10^{-7}$ . For a heterozygous genotypic relative risk of 1.4, the corresponding powers are 50% in the first stage and 60% in the combined analysis.

### ***HLA HAPLOTYPE ANALYSIS***

For the HLA region for which linkage disequilibrium extends over a broad area, we used PLINK to jointly model the impact that inferred SNP haplotypes (derived from the 13 PBC-associated HLA SNPs identified in Table 1) have on disease risk. We first modeled the association of all haplotypes across the region with PBC risk, and then sequentially removed SNPs until the SNPs removed yielded significant haplotypic risks for disease. We then analyzed the remaining SNPs as haplotypes to evaluate the haplotypic effects on PBC risk.

### ***POPULATION ATTRIBUTABLE FRACTION***

Population attributable fraction (AF<sub>p</sub>) for single DRB1 genotypes described in the introduction

were calculated as:  $AF_p = \frac{PF(OR - 1)}{1 + PF(OR - 1)}$  where OR is the odds ratio associated with

DRB1\*0801 genotype and PF is the genotype frequency of the risk genotype.

Population attributable fraction (AF<sub>p</sub>) for a single SNP was calculated over genotypes i (indexed as 1, 2 for the heterozygous and homozygous risk genotypes respectively) and for the Canadian and American replication populations (indexed as j=1,2).

$$AF_p = \frac{\sum_{i=1}^2 \sum_{j=1}^2 PF_{ij}(OR_{ij} - 1)}{1 + \sum_{i=1}^2 \sum_{j=1}^2 PF_{ij}(OR_{ij} - 1)}$$

In this analysis, PF is the risk allele frequency and OR is the odds ratio associated with having a risk genotype. The population attributable risk fraction was computed over all possible combinations of genotypes among the three risk SNPs according to the formula:

$$AF_p = \frac{\sum_{i=1}^2 \sum_{j=1}^2 \sum_{k=1}^3 PF_{ijk}(OR_{ij}-1)}{1 + \sum_{i=1}^2 \sum_{j=1}^2 \sum_{k=1}^3 PF_{ijk}(OR_{ij}-1)}$$

where the factors are defined for each joint genotype (Hanley JA. A heuristic approach to the formulas for population attributable fraction. *J Epidemiol Community Health* 2001;55:508–14). The odds ratios and frequencies used for these computations are shown in supplementary table 11.

### ***CONDITIONAL AND LINEAR TREND ANALYSES***

To further investigate whether a single or multiple SNPs influence disease risk within the *IL12A*, *IL12RB2* and *STAT4* loci (extended Canada based cohort dataset), we conducted conditional analysis using multiple logistic regression with a stepwise selection procedure implemented in SAS version 9.1 (SAS Institute Inc, Cary, North Carolina, USA) for which the entry criterion allowed any SNP with  $P < 0.15$  to enter the model for consideration but at each step, each SNP had to meet a  $P < 0.05$  criterion to be retained. We tested for a linear trend in PBC risk using PLINK, with an additive genetic model, to identify gene dose-response effects for rs6441286/rs574808 and rs3790567 SNPs at the *IL12A* and *IL12RB2* loci. A gene dose effect was also evaluated using SAS version 9.1 and a general model for genotypic effects.

## **SUPPLEMENTARY FIGURE LEGEND**

Supplementary Figure S1. Quantile–Quantile plot of test statistics for the genomewide association study

The  $-\log P$  values from EIGENSTRAT analysis are plotted on the Y axis against the expected  $-\log(P)$  values on the X axis after removing disqualified individuals, outliers, individuals with excess IBD sharing SNPs that failed HWE, and SNPs with MAF  $<0.01$ . Under the null hypothesis of no association at any locus, the data points are expected to follow the green line. The lambda value is 1.056 after adjusting for eigenvectors and 1.085 without eigenvector adjustment.

## **AUTHOR CONTRIBUTIONS**

This study was initiated in 2004 by KAS and EJH who were responsible for initial study design. ALM, RPM, KMP and CNG assisted in developing a clinical network and sample collection/processing framework required for case accrual, and GMH and XL assisted in design of the genetic analyses. Clinical data were gathered by GMH, ALM, RPM, KMP, CNG and CC under the supervision of EJH in Canada; BDJ, EJA and KNL were responsible for the US case series. Genetic data were obtained primarily by XL with assistance from GX, EJW and CX and the data analysis carried out by YL (MSc), YL (MD), XG and KJ under the supervision of CIA and KAS. GMH, XL, CIA, EJH and KAS vouch for the data and the analysis. The paper was written primarily by GMH, XL and KAS with assistance from CX, EJH and KNL. KAS, the senior and corresponding author, decided in collaboration with GMH and EJH, and in agreement with all other authors to publish this paper.

**Supplementary Table S1. Associations between HLA haplotypes and primary biliary cirrhosis.**

| <b>SNP Haplotype</b> | <b>Frequency<br/>Cases</b> | <b>Frequency<br/>Controls</b> | <b><math>\chi^2</math></b> | <b>Degrees of<br/>Freedom</b> | <b>P</b>                |
|----------------------|----------------------------|-------------------------------|----------------------------|-------------------------------|-------------------------|
| CGAG                 | 0.0535                     | 0.09816                       | 18.54                      | 1                             | 1.66x10 <sup>-5</sup>   |
| CAAG                 | 0.1239                     | 0.1643                        | 9.244                      | 1                             | 2.36 x10 <sup>-3</sup>  |
| AACA                 | 0.04533                    | 0.0119                        | 41.65                      | 1                             | 1.09 x10 <sup>-10</sup> |
| CACA                 | 0.2954                     | 0.2009                        | 37.94                      | 1                             | 7.29 x10 <sup>-10</sup> |
| CGAA                 | 0.159                      | 0.1871                        | 3.945                      | 1                             | 0.047                   |
| CAAA                 | 0.3229                     | 0.3377                        | 0.7315                     | 1                             | 0.3924                  |
| Overall              | NA                         | NA                            | 98.7                       | 5                             | 9.93 x10 <sup>-20</sup> |

\*Haplotype is comprised of the following SNPs in the order shown: rs2395148-rs3135363-rs2856683-rs9357152

*Table S1 Legend:* The impact that SNPs and haplotypes across the MHC have on risk for PBC was analysed using PLINK. For this analysis, we included the 13 most significant SNPs in the HLA region that are identified in Table 1 and jointly modeled the impact of the inferred haplotypes derived from these SNPs on disease risk.

**Supplementary Table S2. Comparison of original stage 1 GWA analysis with an analysis restricted to Canadian controls alone.**

| SNP ID             | Chr    | Gene            | Risk allele frequency |                   | Original GWA analysis incorporating Canadian and historic controls<br>n=505 cases and 1507 controls (383 Canadian and 1124 M.D. Anderson "historic") |                          |                  | Alternate GWA analysis incorporating only Canadian controls<br>n=505 cases and 383 Canadian controls |                         |                   |
|--------------------|--------|-----------------|-----------------------|-------------------|------------------------------------------------------------------------------------------------------------------------------------------------------|--------------------------|------------------|------------------------------------------------------------------------------------------------------|-------------------------|-------------------|
|                    |        |                 | US Controls           | Canadian Controls | EIGENSTRAT P                                                                                                                                         | PLINK P                  | OR (95% CI)      | EIGENSTRAT P                                                                                         | PLINK P                 | OR (95% CI)       |
| <b>HLA regions</b> |        |                 |                       |                   |                                                                                                                                                      |                          |                  |                                                                                                      |                         |                   |
| rs2856683          | 6p21.3 | <i>HLA-DQB1</i> | 0.221                 | 0.219             | 1.34 x 10 <sup>-14</sup>                                                                                                                             | 8.58 x 10 <sup>-17</sup> | 1.99 (1.69-2.34) | 6.00 x 10 <sup>-9</sup>                                                                              | 1.05 x 10 <sup>-8</sup> | 1.91 (1.53-2.39)  |
| rs9275312          | 6p21.3 | <i>HLA-DQB1</i> | 0.128                 | 0.121             | 1.99 x 10 <sup>-11</sup>                                                                                                                             | 3.84 x 10 <sup>-13</sup> | 2.01(1.66-2.42)  | 1.05 x 10 <sup>-6</sup>                                                                              | 1.15 x 10 <sup>-6</sup> | 1.93 (1.48-2.53)  |
| rs9275390          | 6p21.3 | <i>HLA-DQB1</i> | 0.247                 | 0.239             | 5.73 x 10 <sup>-11</sup>                                                                                                                             | 1.13 x 10 <sup>-13</sup> | 1.81 (1.55-2.11) | 8.81 x 10 <sup>-7</sup>                                                                              | 1.69 x 10 <sup>-6</sup> | 1.69 (1.36-2.10)  |
| rs7775228          | 6p21.3 | <i>HLA-DQB1</i> | 0.121                 | 0.120             | 1.90 x 10 <sup>-10</sup>                                                                                                                             | 1.70 x 10 <sup>-10</sup> | 1.87 (1.54-2.27) | 8.18 x 10 <sup>-6</sup>                                                                              | 5.04 x 10 <sup>-6</sup> | 1.88 (1.43-2.47)  |
| rs2395148          | 6p21.3 | <i>C6orf10</i>  | 0.022                 | 0.009             | 1.50 x 10 <sup>-9</sup>                                                                                                                              | 5.62 x 10 <sup>-10</sup> | 3.24 (2.20-4.77) | 5.55 x 10 <sup>-7</sup>                                                                              | 6.43 x 10 <sup>-7</sup> | 5.75 (2.61-12.66) |
| rs9277535          | 6p21.3 | <i>HLA-DPB1</i> | 0.232                 | 0.249             | 7.26 x 10 <sup>-9</sup>                                                                                                                              | 8.28 x 10 <sup>-9</sup>  | 1.60 (1.36-1.87) | 3.24 x 10 <sup>-4</sup>                                                                              | 4.88 x 10 <sup>-4</sup> | 1.46 (1.18-1.81)  |
| rs3806156          | 6p21.3 | <i>BTNL2</i>    | 0.350                 | 0.365             | 1.31 x 10 <sup>-8</sup>                                                                                                                              | 1.27 x 10 <sup>-9</sup>  | 1.58 (1.37-1.84) | 0.001                                                                                                | 2.00 x 10 <sup>-4</sup> | 1.46 (1.20-1.78)  |
| rs9357152          | 6p21.3 | <i>HLA-DQB1</i> | 0.741                 | 0.745             | 3.88 x 10 <sup>-8</sup>                                                                                                                              | 7.25 x 10 <sup>-8</sup>  | 1.65 (1.37-1.97) | 5.42 x 10 <sup>-4</sup>                                                                              | 0.010                   | 1.35 (1.08-1.72)  |
| rs3135363          | 6p21.3 | <i>BTNL2</i>    | 0.738                 | 0.712             | 4.46 x 10 <sup>-8</sup>                                                                                                                              | 3.72 x 10 <sup>-7</sup>  | 1.56 (1.30-1.85) | 3.96 x 10 <sup>-4</sup>                                                                              | 0.006                   | 1.37 (1.10-1.72)  |
| rs9277565          | 6p21.3 | <i>HLA-DPB1</i> | 0.193                 | 0.213             | 5.94 x 10 <sup>-8</sup>                                                                                                                              | 8.32 x 10 <sup>-8</sup>  | 1.58 (1.34-1.87) | 0.001                                                                                                | 0.001                   | 1.44 (1.15-1.81)  |
| rs2281389          | 6p21.3 | <i>HLA-DPB1</i> | 0.163                 | 0.184             | 1.58 x 10 <sup>-7</sup>                                                                                                                              | 2.38 x 10 <sup>-7</sup>  | 1.59 (1.33-1.90) | 0.002                                                                                                | 0.004                   | 1.41 (1.12 -1.79) |
| rs660895           | 6p21.3 | <i>HLA-DRB1</i> | 0.200                 | 0.184             | 3.41 x 10 <sup>-7</sup>                                                                                                                              | 4.68 x 10 <sup>-8</sup>  | 1.60 (1.35-1.90) | 7.10 x 10 <sup>-5</sup>                                                                              | 8.60 x 10 <sup>-5</sup> | 1.60 (1.27-2.02)  |
| rs9501626          | 6p21.3 | <i>HLA-DRA</i>  | 0.117                 | 0.092             | 1.34 x 10 <sup>-14</sup>                                                                                                                             | 8.58 x 10 <sup>-17</sup> | 1.99 (1.69-2.34) | 1.30 x 10 <sup>-5</sup>                                                                              | 6.57 x 10 <sup>-6</sup> | 1.99 (1.47-2.70)  |

*Table S2 Legend:* GWA analysis was repeated using Canadian control data only (“Alternate GWA analysis”). The results demonstrate that the associations detected in the initial GWA survey are not secondary to stratification between control sets.

**Supplementary Table S3. Combined (stage 1 and 2) analysis restricted to AMA positive patients.**

| SNP ID                    | Chr.        | Location  | Gene              | Combined                       |                        | Combined<br>AMA positive cases |                        |
|---------------------------|-------------|-----------|-------------------|--------------------------------|------------------------|--------------------------------|------------------------|
|                           |             |           |                   | n=1031 cases and 2713 controls |                        | n=927 cases and 2713 controls  |                        |
|                           |             |           |                   | P                              | Odds Ratio<br>(95% CI) | P                              | Odds Ratio<br>(95% CI) |
| <b>A. HLA regions</b>     |             |           |                   |                                |                        |                                |                        |
| rs2856683                 | 6p21.3      | 32763196  | <i>HLA-DQB</i>    | 1.78 x 10 <sup>-19</sup>       | 1.75 (1.55-1.98)       | 2.8 x 10 <sup>-20</sup>        | 1.79 (1.58-2.03)       |
| rs9275312                 | 6p21.3      | 32773706  | <i>HLA-DQB1</i>   |                                |                        |                                |                        |
| rs9275390                 | 6p21.3      | 32777134  | <i>HLA-DQB1</i>   |                                |                        |                                |                        |
| rs7775228                 | 6p21.3      | 32766057  | <i>HLA-DQB1</i>   |                                |                        |                                |                        |
| rs2395148                 | 6p21.3      | 32429532  | <i>C6orf10</i>    | 3.62 x 10 <sup>-14</sup>       | 2.87 (2.16-3.82)       | 3.55 x 10 <sup>-15</sup>       | 3.00 (2.25-4.00)       |
| rs9277535                 | 6p21.3      | 33162839  | <i>HLA-DPB1</i>   | 3.92 x 10 <sup>-11</sup>       | 1.50 (1.33-1.70)       | 2.12 x 10 <sup>-11</sup>       | 1.52 (1.35-1.72)       |
| rs3806156                 | 6p21.3      | 32481676  | <i>BTNL2</i>      | 1.11 x 10 <sup>-9</sup>        | 1.42 (1.27-1.58)       | 1.25 x 10 <sup>-9</sup>        | 1.43 (1.27-1.60)       |
| rs9357152                 | 6p21.3      | 32772938  | <i>HLA-DQB1</i>   |                                |                        |                                |                        |
| rs3135363                 | 6p21.3      | 32497626  | <i>BTNL2</i>      |                                |                        |                                |                        |
| rs9277565                 | 6p21.3      | 33164875  | <i>HLA-DPB1</i>   |                                |                        |                                |                        |
| rs2281389                 | 6p21.3      | 33167774  | <i>HLA-DPB1</i>   |                                |                        |                                |                        |
| rs660895                  | 6p21.3      | 32685358  | <i>HLA-DRB1</i>   |                                |                        |                                |                        |
| rs9501626                 | 6p21.3      | 32508322  | <i>HLA-DRA</i>    |                                |                        |                                |                        |
| <b>B. Non-HLA regions</b> |             |           |                   |                                |                        |                                |                        |
| rs6441286                 | 3q25.33-q26 | 161211572 | <i>IL12A</i>      | 2.42 x 10 <sup>-14</sup>       | 1.54 (1.38-1.72)       | 7.23 x 10 <sup>-13</sup>       | 1.51 (1.35-1.70)       |
| rs3790567                 | 1p31.2      | 67594965  | <i>IL12RB2</i>    | 2.76 x 10 <sup>-11</sup>       | 1.51 (1.33-1.70)       | 1.11 x 10 <sup>-11</sup>       | 1.53 (1.35-1.73)       |
| rs574808                  | 3q25.33-q26 | 161215677 | <i>IL12A</i>      | 1.88 x 10 <sup>-13</sup>       | 1.54 (1.37-1.73)       | 1.34 x 10 <sup>-12</sup>       | 1.53 (1.36-1.73)       |
| rs6838639                 | 4q27        | 123118615 | <i>TRPC3</i>      | 2.35 x 10 <sup>-3</sup>        | 1.23 (1.08-1.40)       | 2.10 x 10 <sup>-3</sup>        | 1.23 (1.08-1.41)       |
| rs3790565                 | 1p31.2      | 67583944  | <i>IL12RB2</i>    | 1.24 x 10 <sup>-8</sup>        | 1.46 (1.28-1.67)       | 4.56 x 10 <sup>-9</sup>        | 1.49 (1.30-1.70)       |
| rs9964104                 | 18q21       | 50751695  | <i>CCDC68</i>     | 2.13 x 10 <sup>-4</sup>        | 1.25 (1.11-1.40)       | 1.59 x 10 <sup>-4</sup>        | 1.26 (1.12-1.42)       |
| rs3124607                 | 9q34.3      | 138534660 | <i>NOTCH1</i>     |                                |                        |                                |                        |
| rs16833239                | 2q32        | 191648505 | <i>STAT4</i>      | 4.67 x 10 <sup>-5</sup>        | 1.65 (1.30-2.10)       | 2.53 x 10 <sup>-5</sup>        | 1.71 (1.33-2.19)       |
| rs10222962                | 4p15        | 32036553  | <i>PCDH7</i>      |                                |                        |                                |                        |
| rs2211312                 | 13q33.3     | 107203928 | <i>FAM155A</i>    | 0.608                          | 1.05 (0.88-1.24)       | 0.38                           | 1.08 (0.91-1.29)       |
| rs907092                  | 17q21       | 35175785  | <i>IKZF3</i>      | 7.61 x 10 <sup>-6</sup>        | 1.29 (1.15-1.44)       | 6.21 x 10 <sup>-6</sup>        | 1.30 (1.16-1.45)       |
| rs9303277                 | 17q21       | 35229995  | <i>IKZF3</i>      |                                |                        |                                |                        |
| rs4679904                 | 3q26.1      | 161823590 | <i>ARF7</i>       | 1.13 x 10 <sup>-6</sup>        | 1.38(1.21-1.57)        | 4.76 x 10 <sup>-6</sup>        | 1.36 (1.19-1.55)       |
| rs2305480                 | 17q12       | 35315722  | <i>GSDML</i>      |                                |                        |                                |                        |
| rs6140113                 | 20p13       | 691770    | <i>C20orf54</i>   | 0.338                          | 1.08 (0.93-1.25)       | 0.238                          | 1.10 (0.94-1.28)       |
| rs10488631                | 7q32.1      | 128381419 | <i>IRF5/TNPO3</i> | 1.52 x 10 <sup>-7</sup>        | 1.52 (1.30-1.78)       | 6.83 x 10 <sup>-7</sup>        | 1.50 (1.28-1.76)       |
| rs6748358                 | 2q33        | 204465150 | <i>CTLA4</i>      |                                |                        |                                |                        |

*Table S3 Legend:* A repeat of the combined analysis in Table 1, restricted to AMA positive cases only, reveals no significant effect of AMA status on the associations identified.

**Supplementary Table S4. Linear trend for risk variants across genotypes at the *IL12A* and *IL12RB2* loci**

| Locus          | SNP       | Risk Allele | Effect         | Odds Ratio (95% CI) | P                       |
|----------------|-----------|-------------|----------------|---------------------|-------------------------|
| <i>IL12A</i>   | rs6441286 | G           | GG vs GT vs TT | 1.527 (1.323-1.762) | 7.17 x 10 <sup>-9</sup> |
|                | rs574808  | T           | TT vs CT vs CC | 1.497 (1.288-1.74)  | 1.43 x 10 <sup>-7</sup> |
| <i>IL12RB2</i> | rs3790567 | A           | AA vs AG vs GG | 1.511 (1.296-1.762) | 1.41 x 10 <sup>-7</sup> |

*Table S4 Legend:* A gene dose effect can be demonstrated for the *IL12A* and *IL12RB2* loci: using PLINK and an additive model, a clear linear trend for risk variants is seen across all genotypes.

**Supplementary Table S5. Genotypic effects for risk variants at the *IL12A* and *IL12RB2* loci**

| Locus / SNP                | Risk allele | Genotype | Odds ratio (95% CI) |
|----------------------------|-------------|----------|---------------------|
| <i>IL12A</i> / rs6441286   | G           | GG vs TT | 2.215 (1.677-2.926) |
|                            |             | GT vs TT | 1.756 (1.402-2.2)   |
| <i>IL12A</i> / rs574808    | T           | TT vs CC | 2.31 (1.669-3.197)  |
|                            |             | CT vs CC | 1.68 (1.219-2.316)  |
| <i>IL12RB2</i> / rs3790567 | A           | AA vs GG | 2.373 (1.687-3.338) |
|                            |             | AG vs GG | 1.497 (1.221-1.835) |

*Table S5 Legend:* Using SAS and a general model for genotypic effects for *IL12A*, the homozygous genotype effect is less than log-additive, while for *IL12RB2* the effect is approximately log-additive.

**Supplementary Table S6. Association data from fine-mapping of the *IL12RB2*, *STAT4*, and *IL12A* loci.**

| CHR | SNP                | Location  | Minor Allele | Major Allele | MAF-Cases | MAF-Control | P Value                 | Odds Ratio (95%CI)    |
|-----|--------------------|-----------|--------------|--------------|-----------|-------------|-------------------------|-----------------------|
| 1   | IL12RB2_RS3762317  | 67545170  | G            | A            | 0.114     | 0.123       | 4.18X10 <sup>-1</sup>   | 1.097 (0.876 - 1.374) |
| 1   | IL12RB2_RS1890741  | 67555340  | C            | G            | 0.187     | 0.176       | 4.27X10 <sup>-1</sup>   | 1.076 (0.898 - 1.291) |
| 1   | IL12RB2_RS1546159  | 67561014  | T            | C            | 0.015     | 0.021       | 2.70X10 <sup>-1</sup>   | 1.360 (0.786 - 2.352) |
| 1   | IL12RB2_RS11209050 | 67564324  | A            | C            | 0.283     | 0.205       | 2.76X10 <sup>-7</sup>   | 1.532 (1.301 - 1.804) |
| 1   | IL12RB2_RS6693065  | 67572606  | G            | A            | 0.179     | 0.218       | 7.13X10 <sup>-3</sup>   | 1.278 (1.069 - 1.528) |
| 1   | IL12RB2_RS4655703  | 67573960  | A            | T            | 0.463     | 0.407       | 1.66X10 <sup>-3</sup>   | 1.256 (1.089 - 1.447) |
| 1   | IL12RB2_RS746389   | 67575391  | G            | A            | 0.463     | 0.403       | 7.60X10 <sup>-4</sup>   | 1.275 (1.107 - 1.469) |
| 1   | IL12RB2_RS1995147  | 67575647  | G            | C            | 0.462     | 0.403       | 8.41X10 <sup>-4</sup>   | 1.273 (1.105 - 1.467) |
| 1   | IL12RB2_RS10889682 | 67576471  | C            | G            | 0.195     | 0.224       | 5.26X10 <sup>-2</sup>   | 1.188 (0.998 - 1.414) |
| 1   | IL12RB2_RS17129823 | 67577357  | C            | T            | 0.076     | 0.055       | 1.30X10 <sup>-2</sup>   | 1.425 (1.076 - 1.886) |
| 1   | IL12RB2_RS1908632  | 67578394  | G            | T            | 0.333     | 0.248       | 1.22X10 <sup>-7</sup>   | 1.516 (1.299 - 1.769) |
| 1   | IL12RB2_RS3790564  | 67579042  | T            | G            | 0.133     | 0.164       | 1.57X10 <sup>-2</sup>   | 1.281 (1.048 - 1.567) |
| 1   | IL12RB2_RS3790565  | 67583944  | C            | T            | 0.252     | 0.183       | 2.44X10 <sup>-6</sup>   | 1.505 (1.269 - 1.785) |
| 1   | IL12RB2_RS10489625 | 67587008  | G            | A            | 0.046     | 0.038       | 2.64X10 <sup>-1</sup>   | 1.219 (0.861 - 1.726) |
| 1   | IL12RB2_RS946685   | 67588303  | A            | G            | 0.252     | 0.183       | 1.93X10 <sup>-6</sup>   | 1.506 (1.271 - 1.783) |
| 1   | IL12RB2_RS6679356  | 67592782  | C            | T            | 0.270     | 0.190       | 7.02X10 <sup>-8</sup>   | 1.574 (1.334 - 1.858) |
| 1   | IL12RB2_RS10889684 | 67594609  | T            | C            | 0.143     | 0.172       | 2.80X10 <sup>-2</sup>   | 1.246 (1.024 - 1.516) |
| 1   | IL12RB2_RS10749775 | 67594675  | C            | A            | 0.192     | 0.125       | 1.88X10 <sup>-7</sup>   | 1.655 (1.368 - 2.003) |
| 1   | IL12RB2_RS3790567  | 67594965  | A            | G            | 0.337     | 0.250       | 8.32X10 <sup>-8</sup>   | 1.519 (1.303 - 1.771) |
| 1   | IL12RB2_RS6695348  | 67599604  | T            | C            | 0.333     | 0.247       | 9.87X10 <sup>-8</sup>   | 1.519 (1.302 - 1.772) |
| 1   | IL12RB2_RS12564159 | 67603882  | G            | C            | 0.336     | 0.298       | 2.34X10 <sup>-2</sup>   | 1.190 (1.024 - 1.383) |
| 1   | IL12RB2_RS2252596  | 67606089  | A            | G            | 0.015     | 0.022       | 1.23X10 <sup>-1</sup>   | 1.541 (0.886 - 2.681) |
| 1   | IL12RB2_RS2307145  | 67606115  | C            | G            | 0.046     | 0.035       | 1.32X10 <sup>-1</sup>   | 1.311 (0.921 - 1.865) |
| 1   | IL12RB2_RS2307153  | 67606231  | A            | G            | 0.019     | 0.024       | 2.99X10 <sup>-1</sup>   | 1.302 (0.791 - 2.146) |
| 1   | IL12RB2_RS3790568  | 67608648  | A            | G            | 0.052     | 0.052       | 9.69X10 <sup>-1</sup>   | 1.006 (0.734 - 1.379) |
| 1   | IL12RB2_RS3828069  | 67612161  | C            | T            | 0.141     | 0.173       | 1.60X10 <sup>-2</sup>   | 1.273 (1.046 - 1.549) |
| 1   | IL12RB2_RS6676606  | 67615554  | G            | A            | 0.094     | 0.072       | 2.73X10 <sup>-2</sup>   | 1.327 (1.032 - 1.707) |
| 1   | IL12RB2_RS4297265  | 67624923  | G            | A            | 0.476     | 0.418       | 1.20X10 <sup>-3</sup>   | 1.264 (1.097 - 1.457) |
| 1   | IL12RB2_RS2270614  | 67628609  | T            | C            | 0.475     | 0.421       | 2.42X10 <sup>-3</sup>   | 1.244 (1.080 - 1.433) |
| 1   | IL12RB2_RS2229546  | 67634108  | C            | A            | 0.354     | 0.325       | 8.41X10 <sup>-2</sup>   | 1.139 (0.983 - 1.321) |
| 2   | STAT4_RS11676659   | 191627599 | G            | A            | 0.036     | 0.050       | 7.71X10 <sup>-2</sup>   | 1.380 (0.964 - 1.975) |
| 2   | STAT4_RS11893432   | 191630119 | G            | C            | 0.227     | 0.205       | 1.52X10 <sup>-1</sup>   | 1.141 (0.953 - 1.366) |
| 2   | STAT4_RS3024866    | 191631086 | C            | T            | 0.275     | 0.264       | 5.14X10 <sup>-1</sup>   | 1.054 (0.899 - 1.236) |
| 2   | STAT4_RS3024851    | 191637067 | A            | T            | 0.036     | 0.048       | 1.08X10 <sup>-1</sup>   | 1.349 (0.935 - 1.947) |
| 2   | STAT4_RS3024847    | 191638535 | A            | T            | 0.432     | 0.410       | 2.35X10 <sup>-1</sup>   | 1.092 (0.944 - 1.264) |
| 2   | STAT4_RS1517352    | 191639709 | A            | C            | 0.425     | 0.396       | 9.34X10 <sup>-2</sup>   | 1.13 (0.980 - 1.303)  |
| 2   | STAT4_RS13017460   | 191640801 | A            | G            | 0.437     | 0.410       | 1.34X10 <sup>-1</sup>   | 1.115 (0.967 - 1.285) |
| 2   | STAT4_RS1400656    | 191643278 | G            | A            | 0.035     | 0.050       | 4.30X10 <sup>-2</sup>   | 1.454 (1.01 - 2.092)  |
| 2   | STAT4_RS10168266   | 191644049 | T            | C            | 0.226     | 0.196       | 4.15 x 10 <sup>-5</sup> | 1.196 (1.008 - 1.420) |

|   |                  |           |   |   |       |       |                         |                       |
|---|------------------|-----------|---|---|-------|-------|-------------------------|-----------------------|
| 2 | STAT4_RS7594501  | 191646845 | A | G | 0.041 | 0.077 | 3.49X10 <sup>-5</sup>   | 1.973 (1.422 - 2.737) |
| 2 | STAT4_RS2459611  | 191647432 | C | T | 0.116 | 0.108 | 4.60X10 <sup>-1</sup>   | 1.088 (0.870 - 1.361) |
| 2 | STAT4_RS16833238 | 191647744 | T | A | 0.109 | 0.099 | 3.33X10 <sup>-1</sup>   | 1.121 (0.890 - 1.411) |
| 2 | STAT4_RS16833239 | 191648505 | A | G | 0.041 | 0.077 | 6.32 X 10 <sup>-5</sup> | 1.932 (1.397 - 2.674) |
| 2 | STAT4_RS3024921  | 191651517 | A | T | 0.097 | 0.052 | 2.08 X 10 <sup>-6</sup> | 1.945 (1.488 - 2.543) |
| 2 | STAT4_RS11889341 | 191651987 | T | C | 0.277 | 0.229 | 1.98X10 <sup>-3</sup>   | 1.288 (1.097 - 1.512) |
| 2 | STAT4_RS13010752 | 191654848 | A | T | 0.097 | 0.092 | 6.09X10 <sup>-1</sup>   | 1.064 (0.838 - 1.352) |
| 2 | STAT4_RS6434435  | 191662109 | A | G | 0.147 | 0.176 | 2.98X10 <sup>-2</sup>   | 1.240 (1.021 - 1.505) |
| 2 | STAT4_RS10931480 | 191662292 | G | A | 0.153 | 0.187 | 1.23X10 <sup>-2</sup>   | 1.275 (1.054 - 1.543) |
| 2 | STAT4_RS10931481 | 191663097 | G | A | 0.336 | 0.323 | 4.36X10 <sup>-1</sup>   | 1.061 (0.914 - 1.232) |
| 2 | STAT4_RS13011805 | 191664494 | T | C | 0.095 | 0.087 | 4.64X10 <sup>-1</sup>   | 1.096 (0.858 - 1.398) |
| 2 | STAT4_RS4274624  | 191666901 | C | T | 0.261 | 0.230 | 5.06X10 <sup>-2</sup>   | 1.183 (1.000 - 1.399) |
| 2 | STAT4_RS7574865  | 191672878 | T | G | 0.272 | 0.222 | 1.21X10 <sup>-3</sup>   | 1.309 (1.112 - 1.541) |
| 2 | STAT4_RS12463658 | 191673589 | C | A | 0.434 | 0.423 | 5.12X10 <sup>-1</sup>   | 1.049 (0.910 - 1.210) |
| 2 | STAT4_RS10181656 | 191678124 | G | C | 0.278 | 0.230 | 1.90X10 <sup>-3</sup>   | 1.289 (1.098 - 1.514) |
| 2 | STAT4_RS10497711 | 191722166 | G | A | 0.049 | 0.069 | 2.11X10 <sup>-2</sup>   | 1.437 (1.054 - 1.959) |
| 3 | IL12A_RS17810546 | 161147744 | G | A | 0.069 | 0.117 | 9.77X10 <sup>-6</sup>   | 1.784 (1.376 - 2.312) |
| 3 | IL12A_RS9811792  | 161179692 | C | T | 0.416 | 0.424 | 6.30X10 <sup>-1</sup>   | 1.036 (0.898 - 1.195) |
| 3 | IL12A_RS16830960 | 161184588 | G | A | 0.051 | 0.029 | 1.51X10 <sup>-3</sup>   | 1.766 (1.238 - 2.521) |
| 3 | IL12A_RS2243123  | 161192345 | C | T | 0.232 | 0.276 | 5.01X10 <sup>-3</sup>   | 1.263 (1.073 - 1.488) |
| 3 | IL12A_RS583911   | 161193084 | G | A | 0.503 | 0.421 | 4.34X10 <sup>-6</sup>   | 1.392 (1.208 - 1.603) |
| 3 | IL12A_RS2243133  | 161194967 | T | C | 0.045 | 0.028 | 9.49X10 <sup>-3</sup>   | 1.662 (1.128 - 2.450) |
| 3 | IL12A_RS2243135  | 161195687 | C | G | 0.342 | 0.406 | 2.51X10 <sup>-4</sup>   | 1.314 (1.135 - 1.521) |
| 3 | IL12A_RS568408   | 161196161 | A | G | 0.104 | 0.145 | 7.65X10 <sup>-4</sup>   | 1.457 (1.169 - 1.816) |
| 3 | IL12A_RS668998   | 161198245 | G | A | 0.501 | 0.422 | 1.12X10 <sup>-5</sup>   | 1.372 (1.191 - 1.581) |
| 3 | IL12A_RS2243154  | 161198936 | A | G | 0.108 | 0.081 | 8.25X10 <sup>-3</sup>   | 1.375 (1.085 - 1.743) |
| 3 | IL12A_RS4608735  | 161199702 | C | A | 0.107 | 0.124 | 1.58X10 <sup>-1</sup>   | 1.177 (0.938 - 1.476) |
| 3 | IL12A_RS11927521 | 161199779 | G | A | 0.344 | 0.407 | 2.65X10 <sup>-4</sup>   | 1.312 (1.134 - 1.519) |
| 3 | IL12A_RS17826053 | 161200323 | G | T | 0.104 | 0.145 | 7.91X10 <sup>-4</sup>   | 1.459 (1.169 - 1.82)  |
| 3 | IL12A_RS6441284  | 161200962 | G | A | 0.339 | 0.411 | 4.47X10 <sup>-5</sup>   | 1.359 (1.173 - 1.575) |
| 3 | IL12A_RS485497   | 161201826 | G | A | 0.439 | 0.518 | 1.09X10 <sup>-5</sup>   | 1.374 (1.192 - 1.583) |
| 3 | IL12A_RS4680536  | 161202965 | G | A | 0.340 | 0.421 | 4.08X10 <sup>-6</sup>   | 1.410 (1.218 - 1.632) |
| 3 | IL12A_RS9852519  | 161203322 | T | C | 0.470 | 0.372 | 2.11X10 <sup>-8</sup>   | 1.502 (1.302 - 1.732) |
| 3 | IL12A_RS598638   | 161203511 | T | C | 0.170 | 0.173 | 8.32X10 <sup>-1</sup>   | 1.021 (0.847 - 1.23)  |
| 3 | IL12A_RS4679867  | 161206597 | A | T | 0.317 | 0.405 | 4.52X10 <sup>-7</sup>   | 1.464 (1.262 - 1.699) |
| 3 | IL12A_RS4679868  | 161206848 | A | G | 0.494 | 0.387 | 1.58X10 <sup>-9</sup>   | 1.546 (1.342 - 1.782) |
| 3 | IL12A_RS6441286  | 161211572 | G | T | 0.494 | 0.390 | 4.83X10 <sup>-9</sup>   | 1.525 (1.324 - 1.757) |
| 3 | IL12A_RS574808   | 161215677 | C | T | 0.320 | 0.412 | 1.15X10 <sup>-7</sup>   | 1.493 (1.287 - 1.733) |
| 3 | IL12A_RS589545   | 161216294 | A | G | 0.322 | 0.413 | 1.34X10 <sup>-7</sup>   | 1.487 (1.283 - 1.724) |
| 3 | IL12A_RS2936298  | 161226577 | A | G | 0.170 | 0.193 | 9.97X10 <sup>-2</sup>   | 1.167 (0.971 - 1.404) |
| 3 | IL12A_RS17217081 | 161229792 | G | A | 0.015 | 0.018 | 5.22X10 <sup>-1</sup>   | 1.205 (0.68 - 2.134)  |

*Table S6 Legend:* Association data are shown for 80 of 93 SNPs tested in the fine-mapping of Canada-based cases

and controls. Tests for association were carried out using PLINK. MAF corresponds to minor allele frequency. Data

for 9 *IL23R* region SNPs are not shown (all P>0.05).

## Supplementary Table S7 *IL12A* Haplotype associations with PBC

| Haplotype           | Extended Canada-Based Collection |                                   |                                | US-Based Collection           |                                  |                               | Combined Analysis              |                                   |                                | Odds Ratio<br>(95% CI)  |
|---------------------|----------------------------------|-----------------------------------|--------------------------------|-------------------------------|----------------------------------|-------------------------------|--------------------------------|-----------------------------------|--------------------------------|-------------------------|
|                     | Frequency<br>Cases<br>(N=621)    | Frequency<br>Controls<br>(N=1279) | P                              | Frequency<br>Cases<br>(N=410) | Frequency<br>Controls<br>(N=310) | P                             | Frequency<br>Cases<br>(N=1031) | Frequency<br>Controls<br>(N=1589) | P                              |                         |
| <b>TAGTG</b>        | <b>0.491</b>                     | <b>0.305</b>                      | <b>4.82 x 10<sup>-29</sup></b> | <b>0.489</b>                  | <b>0.375</b>                     | <b>1.82 x 10<sup>-5</sup></b> | <b>0.491</b>                   | <b>0.320</b>                      | <b>1.15 x 10<sup>-34</sup></b> | <b>2.01 (1.83-2.30)</b> |
| AGTCA               | 0.309                            | 0.318                             | 0.569                          | 0.326                         | 0.424                            | 2.00 x 10 <sup>-4</sup>       | 0.317                          | 0.340                             | 0.0836                         | 0.90 (0.80-1.01)        |
| TGTTG               | 0.179                            | 0.125                             | 9.37 x 10 <sup>-6</sup>        | 0.179                         | 0.195                            | 0.4378                        | 0.179                          | 0.141                             | 3.00 x 10 <sup>-4</sup>        | 1.33 (1.14-1.54)        |
| Other<br>haplotypes | 0.021                            | 0.252                             |                                | 0.006                         | 0.006                            |                               | 0.013                          | 0.199                             |                                |                         |

*Table S7 Legend:* *IL12A* haplotype analyses were performed in the extended Canada and US-based cases/control collections and a combined analysis then performed (Haploview v.4.1). The 5-locus haplotype analysis consisted in order of the rs4679867, rs4679868, rs6441286, rs574808 and rs589545 SNPs. Three haplotypes accounted for 80% of the overall haplotypes in controls. Haplotypes with an estimated frequency <20% in the control group were designated as ‘‘other haplotypes’’. The most significantly-associated haplotype is shown in bold.

**Supplementary Table S8: Haplotype association results for *IL12RB2***

| Haplotype       | Frequency        |                      | P                              | Odds Ratio (95% CI)      |
|-----------------|------------------|----------------------|--------------------------------|--------------------------|
|                 | Cases<br>(N=621) | Controls<br>(N=1279) |                                |                          |
| <i>10-Locus</i> |                  |                      |                                |                          |
| TGTAGTCAGC      | 0.519            | 0.565                | 7.40 x 10 <sup>-3</sup>        | 0.83 (0.72-0.95)         |
| TTTAGTTAGC      | 0.129            | 0.158                | 0.020                          | 0.79 (0.65-0.92)         |
| GGCAACCCAT      | 0.192            | 0.119                | 2.72 x 10 <sup>-9</sup>        | 1.75 (1.45-2.10)         |
| GGTAGCCAAT      | 0.080            | 0.063                | 0.054                          | 1.29 (1.00 -1.68)        |
| GGCAATCAAT      | 0.018            | 0.040                | 3.00 x 10 <sup>-4</sup>        | 0.43 (0.27-0.68)         |
| GGCGATCAAT      | 0.042            | 0.021                | 4.00 x 10 <sup>-4</sup>        | 1.98 (1.35-2.91)         |
| <i>3-Locus</i>  |                  |                      |                                |                          |
| ACA             | 0.511            | 0.489                | 0.153                          | 1.10 (0.96 – 1.26)       |
| <b>GTC</b>      | <b>0.356</b>     | <b>0.253</b>         | <b>3.07 x 10<sup>-11</sup></b> | <b>1.53 (1.32 -1.77)</b> |
| GTA             | 0.117            | 0.076                | 2.53 x 10 <sup>-5</sup>        | 1.63 (1.30 -20.40)       |
| GCA             | 0.009            | 0.092                | 6.02 x 10 <sup>-23</sup>       | 0.09 (0.05-0.161)        |
| ATC             | 0.006            | 0.073                | 7.27 x 10 <sup>-19</sup>       | 0.08 (0.04-0.162)        |

*Table S8 Legend:* Haplotype analysis for the *IL12RB2* gene was performed on the extended Canada-based collection using Haploview v.4.1. Odds ratios and 95% confidence intervals (CI) are shown. The 10-locus haplotype analysis includes (in order) SNPs rs1908632-rs790564-rs3790565-rs10489625-rs946685-rs6679356-rs10889684-rs10749775-rs3790567-rs6695348, and the 3-locus haplotype analysis includes (in order) SNPs rs4297265-rs2270614-rs2229546. The most significant haplotype association is shown in bold.

**Supplementary Table S9. Replication and combined data analyses showing *STAT4* associations with PBC**

| Chr.     | SNP ID (Location)           | Physical Location | Minor/Major Alleles | US-Based Collection | Extended Canada-Based Collection | Combined Analysis             |                         |
|----------|-----------------------------|-------------------|---------------------|---------------------|----------------------------------|-------------------------------|-------------------------|
|          |                             |                   |                     | P                   | P                                | P                             | Odds Ratio (95% CI)     |
| 2        | rs10168266 (Intron 5)       | 191644049         | <u>T</u> /C         | 0.074               | 4.15 x 10 <sup>-5</sup>          | 5.95 X 10 <sup>-2</sup>       | 1.15 (0.99-1.32)        |
| 2        | rs16833239 (Intron 4)       | 191648505         | A/ <u>G</u>         | 0.482               | 6.32 x 10 <sup>-5</sup>          | 3.69 X 10 <sup>-4</sup>       | 1.53 (1.21-1.93)        |
| <b>2</b> | <b>rs3024921 (Intron 3)</b> | <b>191651517</b>  | <u>A</u> /T         | <b>0.013</b>        | <b>2.08 x 10<sup>-6</sup></b>    | <b>5.76 X 10<sup>-8</sup></b> | <b>1.81 (1.45-2.26)</b> |

*Table S9 Legend:* Association testing between SNPs in *STAT4* were carried out in the US-based collection and the extended Canada-based collection using PLINK. A combined analysis was performed and allelic odds ratios and the corresponding 95% confidence intervals (CI) were calculated. Genome positions are based on the NCBI database, build 36 (hg18). The risk allele for each SNP is underlined and the most significant data is bolded.

**Supplementary Table S10. Stepwise selection/conditional analysis based on highest allelic associations identified as risk variants for PBC**

| <b>Locus</b>          | <b>SNP</b> | <b>Step</b> | <b><math>\chi^2</math> (DF=2)</b> | <b>P</b> |
|-----------------------|------------|-------------|-----------------------------------|----------|
| <b><i>IL12A</i></b>   | rs6441286  | 1           | 24.0482                           | <0.001   |
|                       | rs485497   | 2           | 10.247                            | 0.006    |
|                       | rs17810546 | 3           | 6.5781                            | 0.0373   |
| <b><i>IL12RB2</i></b> | rs10749775 | 1           | 28.2004                           | <0.001   |
|                       | rs1908632  | 2           | 6.3627                            | 0.0415   |
| <b><i>STAT4</i></b>   | rs3024921  | 1           | 24.8585                           | <0.001   |
|                       | rs7574865  | 2           | 17.469                            | 0.0002   |
|                       | rs7594501  | 3           | 10.8064                           | 0.0045   |

*Table S10 Legend:* Using stepwise forward selection, we demonstrate that multiple alleles across the loci *IL12A*, *IL12RB2* and *STAT4* are associated with PBC.

**Supplementary Table S11: Population attributable risk for the *HLA*, *IL12A* and *IL12RB2* loci**

| SNP                      | Genotype                     |       |        | Average PAR |       |       |
|--------------------------|------------------------------|-------|--------|-------------|-------|-------|
| <i>HLA</i> rs2856683     |                              | AA    | CA     | CC          | Total |       |
|                          | <i>Canada-based controls</i> | 540   | 300    | 48          | 888   |       |
|                          | Frequency                    | 0.451 | 0.251  | 0.040       |       |       |
|                          | OR                           | 1     | 1.6    | 1.67        |       |       |
|                          | <i>US-based controls</i>     | 186   | 104    | 19          | 309   |       |
|                          | Frequency                    | 0.155 | 0.087  | 0.016       |       |       |
|                          | OR                           | 1     | 1.7985 | 2.41        |       | 0.212 |
| <i>IL12A</i> rs6441286   |                              | GG    | GT     | TT          |       |       |
|                          | <i>Canada-based controls</i> | 148   | 399    | 334         | 881   |       |
|                          | Frequency                    | 0.124 | 0.335  | 0.281       |       |       |
|                          | OR                           | 1.69  | 1.23   | 1           |       |       |
|                          | <i>US-based controls</i>     | 34    | 164    | 111         | 309   |       |
|                          | Frequency                    | 0.029 | 0.138  | 0.093       |       |       |
|                          | OR                           | 2.98  | 1.39   | 1           |       | 0.215 |
| <i>IL12RB2</i> rs3790567 |                              | AA    | AG     | GG          |       |       |
|                          | <i>Canada-based controls</i> | 53    | 329    | 509         | 891   |       |
|                          | Frequency                    | 0.044 | 0.275  | 0.425       |       |       |
|                          | OR                           | 2.67  | 1.35   | 1           |       |       |
|                          | <i>US-based controls</i>     | 22    | 107    | 178         | 307   |       |
|                          | Frequency                    | 0.018 | 0.089  | 0.149       |       |       |
|                          | OR                           | 1.53  | 1.51   | 1           |       | 0.184 |

*Table S11 Legend:* Population attributable risk fractions were calculated as described in the supplementary appendix, using control subject (US and Canadian) genotyping data for the three most significant variants identified.

### PBC- Quantile-Quantile Plot

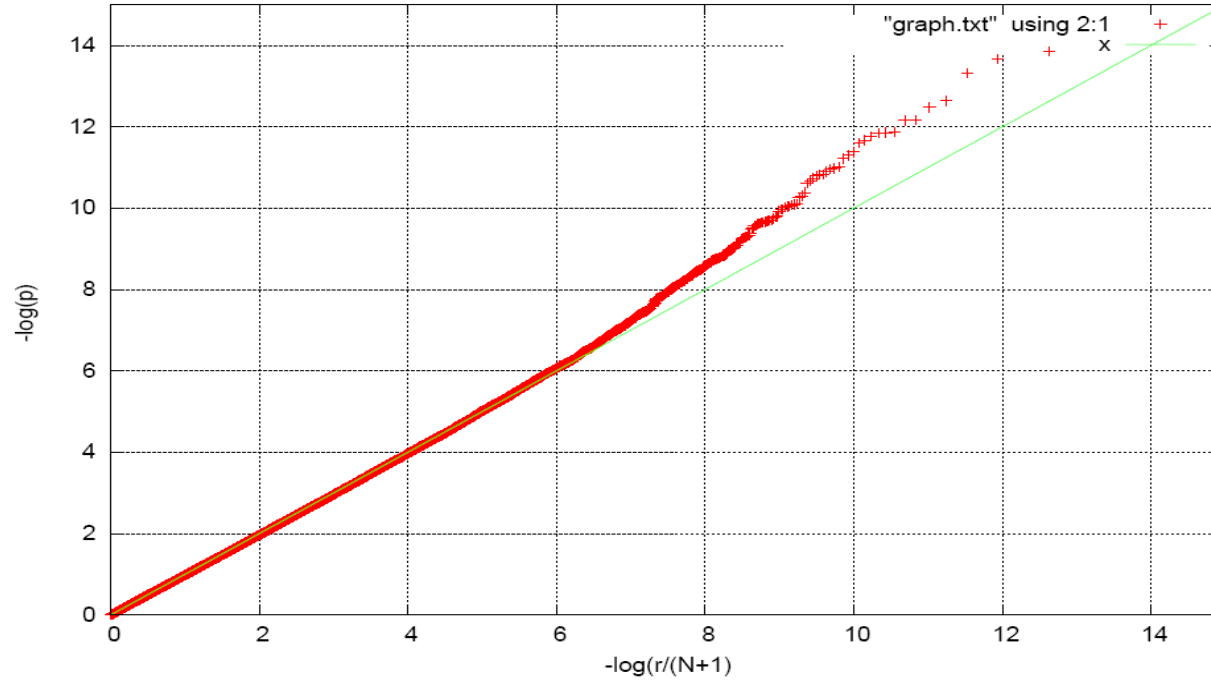

Supplement: nejm_hirschfield_2544sa1.pdf [file nejm_hirschfield_2544sa1.pdf]
